# Supplementary material for: Competition Among Gardnerella Subgroups From the Human Vaginal Microbiome
Source: PubMed Central journal article supplement (PMC6834547; doi:10.3389/fcimb.2019.00374), 2019-10-31
Supplement: Table_1.pdf [file Table_1.pdf]

## Supplementary Materials

**Table S1:** cpn60 subgroup affiliations and origin of selected isolates of *Gardnerella*

| Isolate <sup>1</sup> | cpn60 Subgroup | Species <sup>2</sup>         |
|----------------------|----------------|------------------------------|
| GH005                | A              | <i>G. leopoldii</i>          |
| N72                  |                | <i>G. swidsinskii</i>        |
| WP021                |                | <i>G. swidsinskii</i>        |
| WP022                |                | <i>G. swidsinskii</i>        |
| <b>VN003</b>         |                | <b><i>G. leopoldii</i></b>   |
| NR015                |                | Unknown                      |
| NR016                |                | <i>G. swidsinskii</i>        |
| NR017                |                | <i>G. leopoldii</i>          |
| NR019                |                | <i>G. leopoldii</i>          |
| <b>NR020</b>         |                | <b><i>G. swidsinskii</i></b> |
| NR021                |                | <i>G. swidsinskii</i>        |
| GH019                | B              | <i>G. piovii</i>             |
| N95                  |                | Genome species 3             |
| <b>N170</b>          |                | <b>Genome species 3</b>      |
| GH020                |                | <i>G. piovii</i>             |
| NR026                |                | Genome species 3             |
| GH007                |                | <i>G. piovii</i>             |
| N144                 |                | Genome species 3             |
| <b>VN002</b>         |                | <b><i>G. piovii</i></b>      |
| N165                 | C              | <i>G. vaginalis</i>          |
| <b>NR001</b>         |                | <b><i>G. vaginalis</i></b>   |
| GH021                |                | <i>G. vaginalis</i>          |
| ATCC14018            |                | <i>G. vaginalis</i>          |
| NR037                |                | <i>G. vaginalis</i>          |
| <b>NR038</b>         |                | <b><i>G. vaginalis</i></b>   |
| NR039                |                | <i>G. vaginalis</i>          |
| WP023                |                | <i>G. vaginalis</i>          |
| NR037                |                | <i>G. vaginalis</i>          |
| N160                 | D              | Genome species 10            |
| <b>WP012</b>         |                | <b>Genome species 9</b>      |
| <b>NR003</b>         |                | <b>Genome species 8</b>      |
| NR047                |                | Unknown                      |

<sup>1</sup>Isolates used in co-culture experiments are in bold.

<sup>2</sup>Species identification based on nearest neighbour in the cpnDB\_nr database (version 20190305) downloaded from [www.cpnDB.ca](http://www.cpnDB.ca)
