# Supplementary material for: Competition Among Gardnerella Subgroups From the Human Vaginal Microbiome
Source: PubMed Central journal article supplement (PMC6834547; doi:10.3389/fcimb.2019.00374), 2019-10-31
Supplement: Table_2.pdf [file Table_2.pdf]

**Table S2:** Subgroup specific primers and probes from Balashov et al. (2014)

| Subgroup | Clade | Primer/probe             | Sequence (5' - 3')                            | Length(bp) |
|----------|-------|--------------------------|-----------------------------------------------|------------|
| C        | 1     | Gv1_fuc1_S<br>(Forward)  | CCA GTC ATA AGT TTG CGT TTT ACC               | 24         |
| C        | 1     | Gv1_fuc1_AS<br>(Reverse) | TGG CAC TGG CAA AGT TTA CAA C                 | 22         |
| C        | 1     | Gv1_fuc1_TM              | HEX-CTC GCC GCA AGC ACC ATC AAG<br>CCA-BHQ1   | 24         |
| B        | 2     | Gv2_hyp_S<br>(Forward)   | GCA AAG CAG ACT GAG CGT ATT AG                | 23         |
| B        | 2     | Gv2_hyp_AS<br>(Reverse)  | GTA ATA ATC AGG CTC CTC ATC GC                | 23         |
| B        | 2     | Gv2_hyp_TM               | HEX-CGC AGG CGC TCG CAT AAC AGT<br>GCA-BHQ1   | 24         |
| D        | 3     | Gv3_thi_S (Forward)      | TTC TGC TTC TTC TGC TAT TTG CTG               | 24         |
| D        | 3     | Gv3_thi_AS<br>(Reverse)  | TTC GTT GAC TTT TGG GCA ACA TG                | 23         |
| D        | 3     | Gv3_thi_TM               | 6-FAM-CGG TCC GTG CCG TTC ATT<br>TGG TCC-BHQ1 | 24         |
| A        | 4     | Gv4_cic_S (Forward)      | CCT ACG CAA GCT CCA GAC GAC                   | 21         |
| A        | 4     | Gv4_cic_AS<br>(Reverse)  | ACA AGT TGC ACT CTT CGA GCT GG                | 23         |
| A        | 4     | Gv4_cic_TM               | 6-FAM-ACT CGG CTG AAG CAC ACC<br>ACC ACT-BHQ1 | 24         |
